# Supplementary material for: CYP3A Excipient-Based Microemulsion Prolongs the Effect of Magnolol on Ischemia Stroke Rats
Source: MDPI journal article supplement (doi:10.3390/pharmaceutics12080737), 2020-08-05
Supplement: s1 [file s1]

# Supplementary Materials: CYP3A Excipient-Based Microemulsion Prolongs the Effect of Magnolol on Ischemia Stroke Rats

Jiun-Wen, Guo, Chih-Cheng Chien, and Jiann-Hwa, Chen

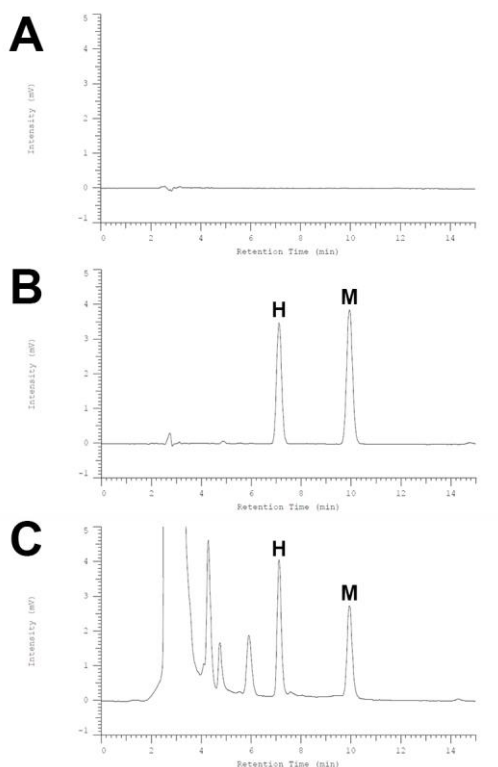

**Figure S1.** Representative high-performance liquid chromatography of magnolol (M) and honokiol (H). (a) blank (b) standard with magnolol (2 µg/ml) and internal standard (honokiol) (c) plasma sample 60 min after 30 mg/kg of intraperitoneally administered magnolol. The retention times of honokiol and magnolol were  $7.1 \pm 0.2$  min and  $9.9 \pm 0.3$  min, respectively. H, honokiol; M, magnolol.

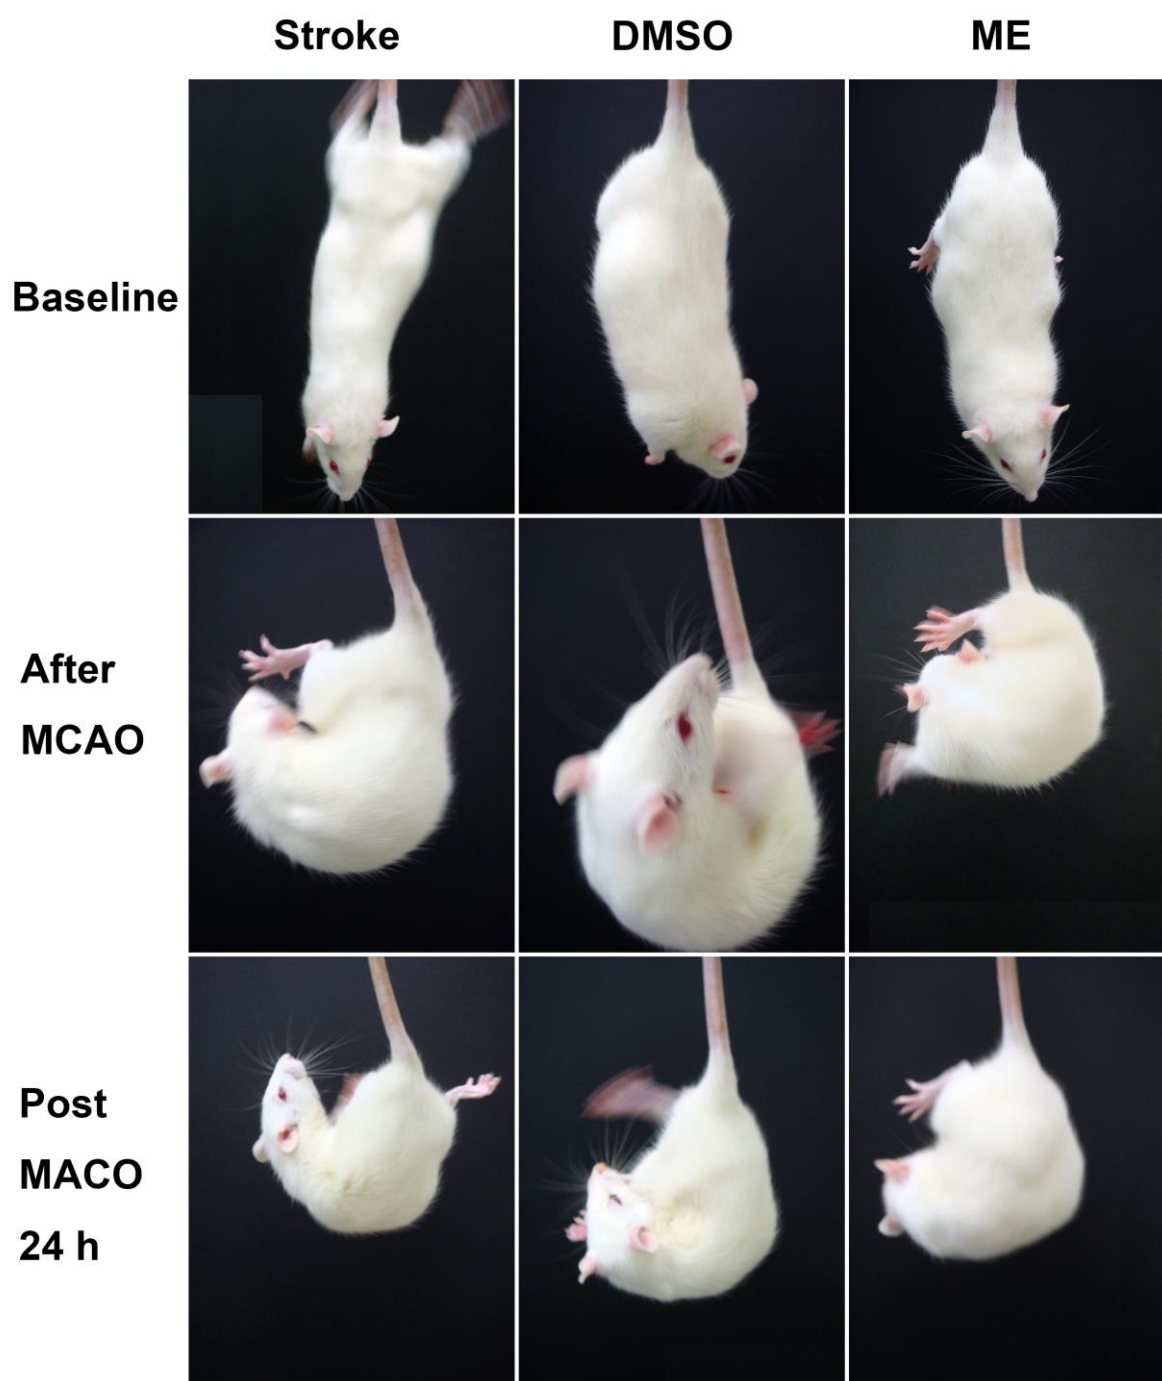

**Figure S2.** Representative the EBST results of all groups of rats showed C-shaped lateral bending body after MCAO. EBST, elevated body swing test; MCAO, middle cerebral arteries occlusion.

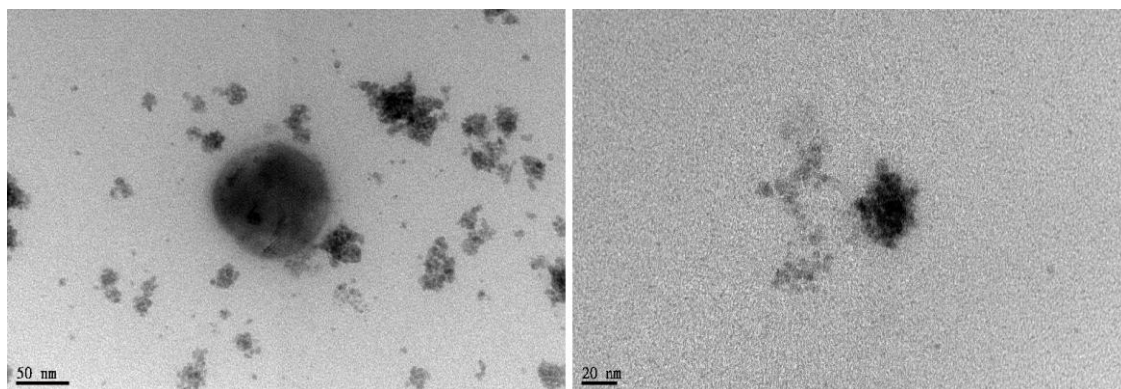

**Figure S3.** Representative the small particle size micelle of formulation B under the observation by TEM. The composition of formulation B was described in Table 1. TEM, transmission electron microscopy.
